# Supplementary material
Source: publisher site journal article supplement (https://www.dovepress.com/get_supplementary_file.php?f=235845.xlsx)
Supplement: Supplementary file 1 [file get_supplementary_file.php]

## Sheet: Trial info, PRO endpoints
	Study details							HRQoL specific							Symptom based											Unvalidated
S.No	Trial number	Study/trial name (if available)	Related publication (if available)	Phase	Drug or treatment arm	Control arm	Endpoint classification	St. George’s Respiratory Questionnaire (SGRQ)	St. George’s Respiratory Questionnaire COPD-specific (SGRQ-C)	COPD Assessment Test (CAT)	Cough and Sputum Assessment Questionnaire (CASA-Q)	Capacity of Daily Living during the Morning (CDLM)	Leicester Cough Questionnaire (LCQ)	Clinical COPD Questionnaire (CCQ)	Baseline/Transition Dyspnea Indexes (BDI/TDI)	Exacerbation of Chronic Pulmonary Disease Tool (EXACT-PRO)	Evaluating Respiratory Symptoms in COPD (E-RS™:COPD)	Early Morning and Nighttime Symptoms of COPD Instruments (EMSCI/NiSCI)	Global Chest Symptoms Questionnaire (GCSQ)	Shortness of Breath with Daily Activities (SOBDA)	Shortness of Breath Questionnaire (SOBQ)	Chronic Respiratory Questionnaire Self-Administered Standardized (CRQ-SAS) dyspnea domain	Borg Dyspnea Scale (Borg CR 10)	Breathlessness Cough and Sputum Scale (BCSS)	Cough Symptom Score (CSS)	Symptom scores/ daily diaries	Patients' global rating	Daily activities (% of Days Able to Perform Usual Daily Activities)	Patient preference/ device satisfaction
1	NCT00567996	Not available (NA)	Kornmann, O., Dahl, R., Centanni, S., Dogra, A., Owen, R., Lassen, C., & Kramer, B. (2011). Once-daily indacaterol versus twice-daily salmeterol for COPD: a placebo-controlled comparison. European Respiratory Journal, 37(2), 273-279.	III	Indacaterol 150, 50 μg	Salmeterol	Secondary	SGRQ							TDI											% of days of poor control (0-3 scale)
2	NCT00297102	AURA	Wedzicha, Jadwiga A., et al. "Efficacy of roflumilast in the COPD frequent exacerbator phenotype." Chest 143.5 (2013): 1302-1311.	III	Roflumilast 500 μg oral once-daily	Placebo	Secondary								TDI focal
3	NCT00297115	HERMES	Calverley, Peter MA, et al. "Roflumilast in symptomatic chronic obstructive pulmonary disease: two randomised clinical trials." The Lancet 374.9691 (2009): 685-694.	III	Roflumilast 500 μg oral once-daily	Placebo	Secondary								TDI focal
4	NCT00076089	OPUS	Rennard, Stephen I., et al. "Reduction of exacerbations by the PDE4 inhibitor roflumilast-the importance of defining different subsets of patients with COPD." Respiratory Research 12.1 (2011): 18.	III	Roflumilast 500 μg oral once-daily	Placebo	Secondary	SGRQ							TDI focal
5	NCT00430729	NA	Calverley, Peter MA, et al. "Effect of 1-year treatment with roflumilast in severe chronic obstructive pulmonary disease." American Journal of Respiratory and Critical Care Medicine 176.2 (2007): 154-161.	III	Roflumilast 500 μg oral once-daily	Placebo	Secondary	SGRQ
6	NCT00313209	EOS	Fabbri, Leonardo M., et al. "Roflumilast in moderate-to-severe chronic obstructive pulmonary disease treated with longacting bronchodilators: two randomised clinical trials." The Lancet 374.9691 (2009): 695-703.	III	Roflumilast + Salmeterol	Placebo+ Salmeterol	Secondary								TDI focal						SOBQ
7	NCT00424268	HELIOS	Cazzola, Mario, Stefano Picciolo, and Maria G. Matera. "Roflumilast in chronic obstructive pulmonary disease: evidence from large trials." Expert opinion on pharmacotherapy 11.3 (2010): 441-449. D D’Urzo, Anthony, et al. "Efficacy and safety of fixed-dose combinations of aclidinium bromide/formoterol fumarate: the 24-week, randomized, placebo-controlled AUGMENT COPD study." Respiratory Research 1…	III	Roflumilast 500 µg oral once-daily+ tiotropium	Placebo + tiotropium	Secondary								TDI focal						SOBQ
8	NCT01437397	AUGMENT	Miravitlles, Marc, et al. "The efficacy of aclidinium/formoterol on lung function and symptoms in patients with COPD categorized by symptom status: a pooled analysis." International journal of chronic obstructive pulmonary disease 11 (2016): 2041. D D’Urzo, Anthony, et al. "Efficacy and safety of fixed-dose combinations of aclidinium bromide/formoterol fumarate: the 24-week, randomized, placebo-c…	III	Aclidinium/formoterol FDC Aclidinium/formoterol 400/12 μg; Aclidinium/formoterol 400/6μg; Aclidinium 400μg; Formoterol 12μg	Placebo	Secondary	SGRQ							BDI, TDI focal		E-RS	EMSCI/NiSCI
9	NCT01462942	ACLIFORM	Singh, Dave, et al. "Efficacy and safety of aclidinium bromide/formoterol fumarate fixed-dose combinations compared with individual components and placebo in patients with COPD (ACLIFORM-COPD): a multicentre, randomised study." BMC pulmonary medicine 14.1 (2014): 178. Miravitlles, Marc, et al. "The efficacy of aclidinium/formoterol on lung function and symptoms in patients with COPD categorized b…	III	Fixed-dose combination aclidinium/ formoterol	Aclidinium/formoterol 400/12 μg; Aclidinium/formoterol 400/6μg; Aclidinium 400μg; Formoterol 12μg; & Placebo	Secondary	SGRQ							TDI		E-RS
10	NCT01572792	AUGMENT extension	D'Urzo, Anthony, et al. "A randomised double-blind, placebo-controlled, long-term extension study of the efficacy, safety and tolerability of fixed-dose combinations of aclidinium/formoterol or monotherapy in the treatment of chronic obstructive pulmonary disease." Respiratory Medicine 125 (2017): 39-48.	III	Fixed-dose combination aclidinium/ formoterol	Aclidinium/formoterol 400/12 μg; Aclidinium/formoterol 400/6μg; Aclidinium 400μg; Formoterol 12μg; & Placebo	Other (non-specified)	SGRQ							TDI		E-RS	EMSCI/NiSCI
11	NCT01001494	ATTAIN	Jones, Paul W., et al. "The effect of aclidinium bromide on daily respiratory symptoms of COPD, measured using the Evaluating Respiratory Symptoms in COPD (E-RS: COPD) diary: pooled analysis of two 6-month Phase III studies." Respiratory Research 17.1 (2016): 61. Bateman, Eric D., David Singh, Paul W. Jones, Alvar Agusti, Rosa Lamarca, Gonzalo de Miquel, Cynthia Caracta, and Esther Garcia Gil. "T…	III	Aclidinium bromide	Placebo	Secondary	SGRQ							BDI/TDI
12	NCT01045161	ACCORD COPD II	Rennard, S. I., Scanlon, P. D., Ferguson, G. T., Rekeda, L., Maurer, B. T., Gil, E. G., & Caracta, C. F. (2013). ACCORD COPD II: a randomized clinical trial to evaluate the 12-week efficacy and safety of twice-daily aclidinium bromide in chronic obstructive pulmonary disease patients. Clinical Drug Investigation, 33(12), 893-904.	III	Aclidinium bromide	Placebo	Additional/other	SGRQ							TDI
13	NCT01053988	NA	Kerwin, Edward M., et al. "A randomised trial of fluticasone furoate/vilanterol (50/25 μg; 100/25 μg) on lung function in COPD." Respiratory Medicine 107.4 (2013): 560-569.	III	Fluticasone Furoate/Vilanterol 100/25 µg OD, 50/25 µg OD	Fluticasone Furoate 100 µg OD; Vilanterol 25 µg OD; Placebo	Secondary															CRQ-SAS
14	NCT01342913	NA	Agustí, A., de Teresa, L., De Backer, W., Zvarich, M. T., Locantore, N., Barnes, N., ... & Crim, C. (2014). A comparison of the efficacy and safety of once-daily fluticasone furoate/vilanterol with twice-daily fluticasone propionate/salmeterol in moderate to very severe COPD. European Respiratory Journal, 43(3), 763-772.	III	Fluticasone Furoate/Vilanterol 100/25 µg OD	Fluticasone Propionate/Salmeterol 500/50 µg BID	Additional/other		SGRQ-C
15	NCT01054885	NA	Martinez, Fernando J., et al. "Fluticasone furoate/vilanterol (100/25; 200/25 μg) improves lung function in COPD: a randomised trial." Respiratory Medicine 107.4 (2013): 550-559.	III	Fluticasone Furoate/Vilanterol 100/25 µg OD; 200/25 µg OD	Vilanterol 25 µg OD; Placebo	Secondary															CRQ-SAS
16	NCT01005901	GLOW 1	D'Urzo, Anthony, et al. "Efficacy and safety of once-daily NVA237 in patients with moderate-to-severe COPD: the GLOW1 trial." Respiratory Research 12.1 (2011): 156.	III	Glycopyrronium bromide 50 μg	Placebo	Secondary	SGRQ							TDI											Mean daily symptom score		Daily activities
17	NCT00929110	GLOW 2	D’Urzo, Anthony, et al. "Once daily glycopyrronium for the treatment of COPD: pooled analysis of the GLOW1 and GLOW2 studies." Current Medical Research and Opinion 30.3 (2014): 493-508.	III	Glycopyrronium bromide 50 μg Placebo to glycopyrronium bromide	Tiotropium 18 μg	Secondary	SGRQ							TDI											Patient diaries for: no Nighttime Awakenings, no Daytime Symptoms, Days Able to Perform Usual Daily Activities, Mean Daily Total Symptom Score		Daily activities
18	NCT01964352	OTEMTO 1	Martinez, Fernando J., et al. "Effects of baseline symptom burden on treatment response in COPD." International Journal of Chronic Obstructive Pulmonary Disease 14 (2019): 181.	III	Once-daily Tiotropium + Olodaterol FDC (5/5 μg or 2.5/5 μg) via Respimat®	Placebo and TIO 5 μg once-daily	Primary+ secondary)	SGRQ (primary)							TDI (secondary)
19	NCT02006732	OTEMTO 2	Singh, Dave, et al. "Tiotropium+ olodaterol shows clinically meaningful improvements in quality of life." Respiratory Medicine 109.10 (2015): 1312-1319.	III	Once-daily Tiotropium + Olodaterol FDC (5/5 μg or 2.5/5 μg) via Respimat®	Placebo and TIO 5 μg once-daily	Primary+ secondary)	SGRQ (primary)							TDI (secondary)
20	NCT01431274	TONADO TM1	NA	III	Once-daily Tiotropium + Olodaterol FDC (5/5 μg or 2.5/5 μg) via Respimat	Individual mono-components: TIO 2.5 µg or 5 µg once-daily; OLO 5 µg once-daily	Secondary	SGRQ							TDI
21	NCT01431287	TONADO 2	Martinez, Fernando J., et al. "P299 Effects of symptom severity at baseline on lung-function and sgrq responses in the otemto® studies." (2016): A255-A256. Maltais, François, et al. "Efficacy of Once-Daily Tiotropium and Olodaterol Maintenance Treatment for COPD: Patient-Reported Outcomes." Chest 148.4 (2015): 638A.	III	Once-daily Tiotropium + Olodaterol FDC (5/5 μg or 2.5/5 μg) via Respimat	Individual mono-components: TIO 2.5 µg or 5 µg once-daily; OLO 5 µg once-daily	Primary+secondary	SGRQ (primary)							TDI (secondary)												Patients global rating (PGR)
22	NCT00793624	NA	NA	III	Olodaterol 5 μg or 10 μg once daily	Formoterol 12 μg BID or Placebo	Primary+secondary	SGRQ (secondary)							TDI (primary)												Secondary: Patient's Global Rating (PGR) was a patient assessment of their health (respiratory condition) at each visit (compared to the day before they started study drug) and ranged from 1 (very much better) to 7 (very much worse).
23	NCT 00782210	NA	Ferguson, Gary T., et al. "Efficacy and safety of olodaterol once daily delivered via Respimat® in patients with GOLD 2–4 COPD: results from two replicate 48-week studies." International Journal of Chronic Obstructive Pulmonary Disease 9 (2014): 629.	III	Olodaterol 5 μg or 10 μg once daily	Placebo	Secondary								none												Secondary: Patient's Global Rating (PGR) was a patient assessment of their health (respiratory condition) at each visit (compared to the day before they started study drug) and ranged from 1 (very much better) to 7 (very much worse).
24	NCT01315249	ILLUMINATE	Vogelmeier, Claus F., et al. "Efficacy and safety of once-daily QVA149 compared with twice-daily salmeterol–fluticasone in patients with chronic obstructive pulmonary disease (ILLUMINATE): a randomised, double-blind, parallel group study." The Lancet Respiratory Medicine 1.1 (2013): 51-60.	III	Indacaterol and glycopyrronium (QVA149) 110/50 μg once daily	Salmeterol- fluticasone (SFC) 50/500 μg twice daily, Placebo	Secondary		SGRQ-C						TDI											Symptom Scores Reported Using the e- diary (0-3 scale): diary records morning and evening daily clinical symptoms including cough, wheezing, shortness of breath, sputum volume, sputum purulence, night time awakenings and rescue medication use. Scale ranges: ranges are 0 to 3 with varying scale Results that pertain to the question being asked. 0 is the minimum score = "none" or "No symptoms" or "n…
25	NCT01120691	SPARK	Wedzicha, Jadwiga A., et al. "Analysis of chronic obstructive pulmonary disease exacerbations with the dual bronchodilator QVA149 compared with glycopyrronium and tiotropium (SPARK): a randomised, double-blind, parallel-group study." The Lancet Respiratory Medicine 1.3 (2013): 199-209.	III	QVA149 (fixed-dose combination of indacaterol 110 μg and glycopyrronium 50 μg), gly. 50 μg, or tio. 18 μg	Glycopyrronium 50 μg once daily, Open Label tiotropium 18 μg once daily	Secondary	SGRQ
26	NCT01490125	BLAZE	NA	III	QVA149 110/50 µg	Open Label tiotropium 18 μg once daily, placebo	Primary+ Secondary					CDLM (secondary)			Patient reported dyspnea: SAC BDI/TDI (both primary, secondary)
27	NCT01202188	SHINE	Chapman, Kenneth R., et al. "QVA149 improves lung function, dyspnea, and health status independent of previously prescribed medications and COPD severity: A subgroup analysis from the SHINE and ILLUMINATE studies." Chronic Obstructive Pulmonary Diseases: Journal of the COPD Foundation 2.1 (2015): 48.	III	QVA149 110/50 µg	Glycopyrronium 50 μg, indacaterol 150 μg, Placebo, Open Label tiotropium 18 μg	Secondary	SGRQ							BDI/TDI											% of Days With "No Daytime Symptoms"		% of "Days Able to Perform Usual Daily Activities": Did your respiratory symptoms stop you performing your usual activities today?-Not at all in their daily diary. The percentage of days is calculated by the number of days patient is able to perform daily activities/total number of days with evaluable data X 100.
28	NCT01316913	NA	Tabberer, Maggie, Jean Brooks, and Teresa Wilcox. "A meta-analysis of four randomized clinical trials to confirm the reliability and responsiveness of the Shortness of Breath with Daily Activities (SOBDA) questionnaire in chronic obstructive pulmonary disease." Health and Quality of Life Outcomes 13.1 (2015): 177.	III	GSK573719/GW642444 125/25 GSK573719/GW642444 62.5/25	GSK573719 tiotropium bromide	Other	SGRQ							TDI					SOBDA
29	NCT01316900	NA	Tabberer, Maggie, Jean Brooks, and Teresa Wilcox. "A meta-analysis of four randomized clinical trials to confirm the reliability and responsiveness of the Shortness of Breath with Daily Activities (SOBDA) questionnaire in chronic obstructive pulmonary disease." Health and Quality of Life Outcomes 13.1 (2015): 177.	III	GSK573719/GW642444 125/25 GSK573719/GW642444 62.5/25	GSK573719 tiotropium bromide	Other	SGRQ							TDI					SOBDA
30	NCT01636713	NA	Zheng, Jinping, et al. "Efficacy and safety of once-daily inhaled umeclidinium/vilanterol in Asian patients with COPD: results from a randomized, placebo-controlled study." International Journal of Chronic Obstructive Pulmonary Disease 10 (2015): 1753.	III	GSK573719/VI 62.5/25 GSK573719/VI 125/25	Placebo	Secondary	SGRQ		CAT					Secondary: TDI
31	NCT01777334	NA	Maleki-Yazdi, M. R., Kaelin, T., Richard, N., Zvarich, M., & Church, A. (2014). Efficacy and safety of umeclidinium/vilanterol 62.5/25 mcg and tiotropium 18 mcg in chronic obstructive pulmonary disease: results of a 24-week, randomized, controlled trial. Respiratory Medicine, 108(12), 1752-1760.	III	Umeclidinium/Vilanterol 62.5/25 mcg	Tiotropium 18 mcg	Other	SGRQ							none
32	NCT01899742	NA	Kerwin, E. M., Kalberg, C. J., Galkin, D. V., Zhu, C. Q., Church, A., Riley, J. H., & Fahy, W. A. (2017). Umeclidinium/vilanterol as step-up therapy from tiotropium in patients with moderate COPD: a randomized, parallel-group, 12-week study. International Journal of Chronic Obstructive Pulmonary Disease, 12, 745.	III	Umeclidinium/Vilanterol 62.5/25 mcg	Tiotropium 18 mcg	Secondary	SGRQ		CAT					TDI
33	NCT01817764	NA	Donohue, J. F., Worsley, S., Zhu, C. Q., Hardaker, L., & Church, A. (2015). Improvements in lung function with umeclidinium/vilanterol versus fluticasone propionate/salmeterol in patients with moderate-to-severe COPD and infrequent exacerbations. Respiratory Medicine, 109(7), 870-881.	III	Umeclidinium/vilanterol Fluticasone propionate/salmeterol	Placebo	Other	SGRQ		CAT					BDI/TDI
34	NCT02152605	NA	Siler, T. M., Donald, A. C., O’Dell, D., Church, A., & Fahy, W. A. (2016). A randomized, parallel-group study to evaluate the efficacy of umeclidinium/vilanterol 62.5/25 μg on health-related quality of life in patients with COPD. International Journal of Chronic Obstructive Pulmonary Disease, 11, 971.	III	Umeclidinium/vilanterol	Placebo	Primary	SGRQ							none
35	NCT02257385	NA	Kalberg, C., O’Dell, D., Galkin, D., Newlands, A., & Fahy, W. A. (2016). Dual bronchodilator therapy with umeclidinium/vilanterol versus tiotropium plus indacaterol in chronic obstructive pulmonary disease: a randomized controlled trial. Drugs in R&D, 16(2), 217-227.	III	Umeclidinium/vilanterol Tiotropium Indacaterol Albuterol/salbutamol	UMEC/VI matching Placebo. Tiotropium matching Placebo. Indacaterol matching Placebo.	Other	SGRQ							TDI
36	NCT01313650	NA	Donohue, J. F., Maleki-Yazdi, M. R., Kilbride, S., Mehta, R., Kalberg, C., & Church, A. (2013). Efficacy and safety of once-daily umeclidinium/vilanterol 62.5/25 mcg in COPD. Respiratory Medicine, 107(10), 1538-1546.	III	GSK573719/GW642444	Placebo	Other	SGRQ							TDI					SOBDA
37	NCT01313637	NA	Celli, B., Crater, G., Kilbride, S., Mehta, R., Tabberer, M., Kalberg, C. J., & Church, A. (2014). Once-daily umeclidinium/vilanterol 125/25 μg therapy in COPD: a randomized, controlled study. Chest, 145(5), 981-991.	III	GSK573719/GW642444 125/25mcg GSK573719 125 mcg GW642444 25mcg	Placebo	Other	SGRQ							TDI					SOBDA
38	NCT02207829	NA	Feldman, G., Maltais, F., Khindri, S., Vahdati-Bolouri, M., Church, A., Fahy, W. A., & Trivedi, R. (2016). A randomized, blinded study to evaluate the efficacy and safety of umeclidinium 62.5 μg compared with tiotropium 18 μg in patients with COPD. International Journal of Chronic Obstructive Pulmonary Disease, 11, 719.	III	Umeclidinium Tiotropium	Umeclidinium matching Placebo, Tiotropium matching Placebo.	Other	SGRQ		CAT					TDI
39	NCT00144339	UPLIFT	Tashkin, D. P., Celli, B. R., Decramer, M., Lystig, T., Liu, D., & Kesten, S. (2012). Efficacy of tiotropium in COPD patients with FEV1≥ 60% participating in the UPLIFT® trial. COPD: Journal of Chronic Obstructive Pulmonary Disease, 9(3), 289-296.	III	Tiotropium	Placebo	Secondary	SGRQ
40	NCT01313494	ACROSS	Zheng, J., Yang, J., Zhou, X., Zhao, L., Hui, F., Wang, H., ... & Brose, M. (2014). Roflumilast for the treatment of COPD in an Asian population: a randomized, double-blind, parallel-group study. Chest, 145(1), 44-52.	III	Roflumilast, Salbutamol	Placebo	Secondary								TDI											COPD symptom score: Symptoms of chronic bronchitis with respect to cough and sputum production were assessed daily by the patient and recorded in a diary. Symptoms were assessed on a 4-point scale as follows: Cough: 0: no cough; 1: mild cough (at some time during the day); 2: moderate cough (regularly during the day); 3: severe cough (never free of cough or feeling free of need to cough). Sputum …
41	NCT01696058	ANHELTO 2	ZuWallack, R., Allen, L., Hernandez, G., Ting, N., & Abrahams, R. (2014). Efficacy and safety of combining olodaterol Respimat® and tiotropium HandiHaler® in patients with COPD: results of two randomized, double-blind, active-controlled studies. International Journal of Chronic Obstructive Pulmonary Disease, 9, 1133.	III	Tiotropium, Olodaterol	Placebo matching olodaterol	Secondary	SGRQ
42	NCT00463567	NA	Donohue, J. F., Fogarty, C., Lotvall, J., Mahler, D. A., Worth, H., Yorgancioglu, A., ... & Kramer, B. (2010). Once-daily bronchodilators for chronic obstructive pulmonary disease: indacaterol versus tiotropium. American Journal of Respiratory and Critical Care Medicine, 182(2), 155-162.	III	Indacaterol Formoterol (12 µg b.i.d.) Tiotropium (18 µg o.d.)	Placebo to Indacaterol Placebo to Formoterol	Secondary	SGRQ							TDI
43	NCT00393458	NA	Jones, P. W., Mahler, D. A., Gale, R., Owen, R., & Kramer, B. (2011). Profiling the effects of indacaterol on dyspnoea and health status in patients with COPD. Respiratory Medicine, 105(6), 892-899.	III	Indacaterol Formoterol	Placebo to indacaterol Placebo to formoterol	Secondary	SGRQ							TDI											Percentage of days of poor control was defined as the number of days in the patient diary with a score ≥ 2 (scale of 0-3, a higher number means more severe symptoms) for at least 2 of 5 symptoms (cough, wheeze, production of sputum, color of sputum, breathlessness)
44	NCT00794157	NA	To, Y., Kinoshita, M., Lee, S. H., Hang, L. W., Ichinose, M., Fukuchi, Y., ... & Kramer, B. (2012). Assessing efficacy of indacaterol in moderate and severe COPD patients: a 12-week study in an Asian population. Respiratory Medicine, 106(12), 1715-1721.	III	Indacaterol 150 μg capsules Indacaterol 300 μg capsules	Placebo	Secondary	SGRQ							TDI											Patients recorded their daily clinical symptoms, i.e., percentages of nights with ‘no nighttime awakenings’ and percentage of ‘days able to perform usual daily activities’ in electronic patient diaries		% of days able to perform usual daily activities’ in electronic patient diaries
45	NCT00900731	INTENSITY	Buhl, R., Dunn, L. J., Disdier, C., Lassen, C., Amos, C., Henley, M., & Kramer, B. (2011). Blinded 12-week comparison of once-daily indacaterol and tiotropium in COPD. European Respiratory Journal, 38(4), 797-803.	III	Indacaterol 150 μg Tiotropium 18 μg	Placebo to Indacaterol Placebo to Tiotropium	Secondary	SGRQ							TDI
46	NCT01778062	INFINITY	Kim, C. J., Yoon, H. K., Park, M. J., Yoo, K. H., Jung, K. S., Park, J. W., ... & Oh, Y. M. (2017). Inhaled indacaterol for the treatment of COPD patients with destroyed lung by tuberculosis and moderate-to-severe airflow limitation: results from the randomized INFINITY study. International Journal of Chronic Obstructive Pulmonary Disease, 12, 1589.	III	Indacaterol	Placebo	Secondary		SGRQ-C						TDI
47	NCT02347774	GOLDEN-4	Ohar, J., Tosiello, R., Goodin, T., & Sanjar, S. (2019). Efficacy and safety of a novel, nebulized glycopyrrolate for the treatment of COPD: effect of baseline disease severity and age; pooled analysis of GOLDEN 3 and GOLDEN 4. International Journal of Chronic Obstructive Pulmonary Disease, 14, 27.	III	SUN-101 50 mcg/ 25 mg	Placebo	Other/Additional	SGRQ																					patients’ preference for the inhaler devices
48	NCT02347761	GOLDEN-3	Ohar, J., Tosiello, R., Goodin, T., & Sanjar, S. (2019). Efficacy and safety of a novel, nebulized glycopyrrolate for the treatment of COPD: effect of baseline disease severity and age; pooled analysis of GOLDEN 3 and GOLDEN 4. International Journal of Chronic Obstructive Pulmonary Disease, 14, 27.	III	SUN-101 50 mcg/ 25 mg	Placebo	Other/Additional	SGRQ																					patients’ preference for the inhaler devices
49	NCT01604278	GLOW 6	Vincken, W., Aumann, J., Chen, H., Henley, M., McBryan, D., & Goyal, P. (2014). Efficacy and safety of coadministration of once-daily indacaterol and glycopyrronium versus indacaterol alone in COPD patients: the GLOW6 study. International Journal of Chronic Obstructive Pulmonary Disease, 9, 215.	III	NVA237 50 µg and indacaterol 150 µg	Placebo to NVA237 and indacaterol 150 µg	Secondary		SGRQ-C						TDI											Patient Diary: Mean Daily Total and Individual Symptom Scores (0-3 scale); Symptoms (respiratory, cough, wheeze, sputum color, sputum production, breathlessness, sore throat, nasal discharge or congestion, and fever)
50	NCT01513460	GLISTEN	Frith, P. A., Thompson, P. J., Ratnavadivel, R., Chang, C. L., Bremner, P., Day, P., ... & Glisten Study Group. (2015). Glycopyrronium once-daily significantly improves lung function and health status when combined with salmeterol/fluticasone in patients with COPD: the GLISTEN study—a randomised controlled trial. Thorax, 70(6), 519-527.	III	NVA237 50 µg once daily Tiotropium 18 µg once daily Salmeterol/fluticasone	NVA237 placebo + Tiotropium placebo	Secondary		SGRQ-C						none											Mean Percentage of Nights With 'no Nighttime Awakenings'		Mean % of Days With Performance of Usual Activities
51	NCT01566604	GLOW7	NA	III	NVA237	Placebo	Secondary	SGRQ							TDI											Symptom scores: Total, respiratory, cough, wheeze, sputum production, sputum color, breathlessness
52	NCT01613326	GLOW 5	Chapman, K. R., Beeh, K. M., Beier, J., Bateman, E. D., D’Urzo, A., Nutbrown, R., ... & D’Andrea, P. (2014). A blinded evaluation of the efficacy and safety of glycopyrronium, a once-daily long-acting muscarinic antagonist, versus tiotropium, in patients with COPD: the GLOW5 study. BMC Pulmonary Medicine, 14(1), 4.	III	NVA237 Tiotropium salbutamol/albuterol	Placebo to tiotropium Placebo to NVA237	Secondary	SGRQ							TDI											Symptom scores: Participants completed eDiaries providing scores 0 to 3 for symptoms: Cough and wheeze (none, mild, moderate, severe); sputum volume (none, less than 5 mL, 5-25 mL, >25 mL); sputum color (none, white-grey, yellow, green); lowest level of activity causing breathlessness (never or only when running, when walking uphill or upstairs, when walking on flat ground, at rest).
53	NCT01709864	GEM1	LaForce, C., Feldman, G., Spangenthal, S., Eckert, J. H., Henley, M., Patalano, F., & D’andrea, P. (2016). Efficacy and safety of twice-daily glycopyrrolate in patients with stable, symptomatic COPD with moderate-to-severe airflow limitation: the GEM1 study. International Journal of Chronic Obstructive Pulmonary Disease, 11, 1233.	III	NVA237	Placebo	Secondary	SGRQ		CAT					TDI											Electronic diary, Daily symptom scores: Patients reported symptoms using an electronic diary. The diary has 9 symptom questions each am and each pm. Each question can be answered w/1 of 4 pre-defined answers, with a unit value of 0-3, 0 is least & 3 is most severe symptom. Symptom scores are calculated as the mean of combined daily symptom scores(combined from am & pm)for each patient over 12 wee…		Mean % of Days With Performance of Usual Activities
54	NCT01715298	GEM2	Kerwin, E., Siler, T. M., Korenblat, P., White, A., Eckert, J. H., Henley, M., ... & D’Andrea, P. (2016). Efficacy and safety of twice-daily glycopyrrolate versus placebo in patients with COPD: the GEM2 study. Chronic Obstructive Pulmonary Diseases, 3(2), 549.	III	NVA237	Placebo	Secondary	SGRQ		CAT					TDI											Electronic diary, symptom scores: Patients reported symptoms using an electronic diary. The diary has 9 symptom questions each am and each pm. Each question can be answered w/1 of 4 pre-defined answers, with a unit value of 0-3, 0 is least & 3 is most severe symptom. Symptom scores are calculated as the mean of combined daily symptom scores(combined from am & pm)for each patient over 12 weeks		Mean % of Days With Performance of Usual Activities
55	NCT01529632	BEACON	Dahl, R., Jadayel, D., Alagappan, V. K., Chen, H., & Banerji, D. (2013). Efficacy and safety of QVA149 compared to the concurrent administration of its monocomponents indacaterol and glycopyrronium: the BEACON study. International Journal of Chronic Obstructive Pulmonary Disease, 8, 501.	III	QVA149 NVA237 QAB149	Placebo	Secondary	SGRQ							TDI											Symptom score: (coughing, wheezing, sputum production, breathlessness) according to daily electronic diary data on a scale of 0 to 3
56	NCT01574651	QUANTIFY	Buhl, R., Gessner, C., Schuermann, W., Foerster, K., Sieder, C., Hiltl, S., & Korn, S. (2015). Efficacy and safety of once-daily QVA149 compared with the free combination of once-daily tiotropium plus twice-daily formoterol in patients with moderate-to-severe COPD (QUANTIFY): a randomised, non-inferiority study. Thorax, 70(4), 311-319.	III	QVA149 Tiotropium Formoterol	Placebo to QVA149 Placebo to tiotropium Placebo to formoterol	Secondary		SGRQ-C						TDI
57	NCT01610037	NA	NA	III	QVA149 Tiotropium	Placebo	Secondary		SGRQ-C																	Symptom scores, electronic diary (eDiary) to record daily clinical symptoms, or rescue medication. The patients will be instructed to routinely complete the patient diary twice daily. There are 9 total symptom questions for a total possible score of 27 at each timepoint.2. day with 'no daytime symptoms' is defined from the diary data as any day where the patient has recorded in the evening no cou…		Mean % of Days With Performance of Usual Activities
58	NCT01682863	FLIGHT3	Ferguson, G. T., Taylor, A. F., Thach, C., Wang, Q., Schubert-Tennigkeit, A. A., Patalano, F., & Banerji, D. (2016). Long-term maintenance bronchodilation with indacaterol/glycopyrrolate versus indacaterol in moderate-to-severe COPD patients: the FLIGHT 3 study. Chronic Obstructive Pulmonary Diseases, 3(4), 716.	III	QVA149 QAB149	Placebo	Secondary																			Daily symptom score: The participant recorded symptom scores twice daily in the eDiary. The daily clinical symptoms included: cough, wheezing, shortness of breath, sputum volume, sputum color, and night time awakening. The range of scores for each assessment is 0 to 3 where 0 indications No symptom and 3 indicates a Severe symptom. The maximum daytime total score is 27 and the maximum nighttime t…
59	NCT01709903	LANTERN	Zhong, N., Wang, C., Zhou, X., Zhang, N., Humphries, M., Wang, L., Patalano F., & Banerji, D. (2016). Efficacy and safety of indacaterol/glycopyrronium (IND/GLY) versus salmeterol/fluticasone in Chinese patients with moderate-to-severe chronic obstructive pulmonary disease: the Chinese cohort from the LANTERN study. COPD: Journal of Chronic Obstructive Pulmonary Disease, 13(6), 686-692.	III	QVA149 Fluticasone/salmeterol	Placebo to QVA149 Placebo to fluticasone/salmeterol	Secondary	SGRQ							TDI											e-dairy: Percentage of nights with 'no nighttime awakenings', percentage of days with 'no daytime symptoms'		Percentage of 'days able to perform usual daily activities' over 26 weeks (FAS)
60	NCT01712516	FLIGHT2	Ohar, J. A., Sharma, S., Goodin, T., Bowling, A., Price, B., Ozol-Godfrey, A., & Sanjar, S. (2019). Efficacy of Indacaterol/Glycopyrrolate in Patients with COPD by Airway Reversibility at Baseline: A Pooled Analysis of the FLIGHT1 and FLIGHT2 12-Week Studies. COPD: Journal of Chronic Obstructive Pulmonary Disease, 16(2), 133-139.	III	QVA149 (27.5/12.5 ug twice daily (b.i.d.) Single Dose Dry Powder Inhaler (SDDPI) QAB149 NVA237	Placebo	Secondary	SGRQ		CAT					TDI											Daily symptoms score (Morning and evening symptom scores ) 0-3 e-diary: Participant recorded symptom scores twice daily in the eDiary. The daily clinical symptoms included: cough, wheezing, shortness of breath, sputum volume, sputum color, and night time awakening. The range of scores for each assessment is 0 to 3 where 0 indications No symptom and 3 indicates a Severe symptom. The maximum daytim…
61	NCT01727141	FLIGHT1	Ohar, J. A., Sharma, S., Goodin, T., Bowling, A., Price, B., Ozol-Godfrey, A., & Sanjar, S. (2019). Efficacy of Indacaterol/Glycopyrrolate in Patients with COPD by Airway Reversibility at Baseline: A Pooled Analysis of the FLIGHT1 and FLIGHT2 12-Week Studies. COPD: Journal of Chronic Obstructive Pulmonary Disease, 16(2), 133-139.	III	QVA149 (27.5/12.5 ug twice daily (b.i.d.) Single Dose Dry Powder Inhaler (SDDPI) QAB149 NVA237	Placebo	Secondary	SGRQ		CAT					TDI											Daily symptoms score (Morning and evening symptom scores ) 0-3 e-diary: Participant recorded symptom scores twice daily in the eDiary. The daily clinical symptoms included: cough, wheezing, shortness of breath, sputum volume, sputum color, and night time awakening. The range of scores for each assessment is 0 to 3 where 0 indications No symptom and 3 indicates a Severe symptom. The maximum daytim…
62	NCT01782326	FLAME	Wedzicha, J.A., Banerji, D., Chapman, K.R., Vestbo, J., Roche, N., Ayers, R.T., Thach, C., Fogel, R., Patalano, F. and Vogelmeier, C.F., 2016. Indacaterol–glycopyrronium versus salmeterol–fluticasone for COPD. New England Journal of Medicine, 374(23), pp.2222-2234.	III	QVA149	Long acting B2 agonist (LABA) and inhaled corticosteroid (ICS)	Secondary		SGRQ-C
63	NCT01053988	NA	Kerwin, Edward M., Catherine Scott-Wilson, Lisa Sanford, Stephen Rennard, Alvar Agusti, Neil Barnes, and Courtney Crim. A randomised trial of fluticasone furoate/vilanterol (50/25 μg; 100/25 μg) on lung function in COPD. Respiratory Medicine 107, no. 4 (2013): 560-569.	III	Fluticasone furiate/GW642444 Inhalation Powder FF Inhalation Powder GW642444 Inhalation Powder	Placebo	Secondary/other															CRQ-SAS
64	NCT01342913	NA	Agustí, A., de Teresa, L., De Backer, W., Zvarich, M. T., Locantore, N., Barnes, N., ... & Crim, C. (2014). A comparison of the efficacy and safety of once-daily fluticasone furoate/vilanterol with twice-daily fluticasone propionate/salmeterol in moderate to very severe COPD. European Respiratory Journal, 43(3), 763-772.	III	Fluticasone Furoate 100 mcg/Vilanterol 25 mcg	Fluticasone Propionate 500 mcg/Salmeterol 50 mcg	Other	SGRQ
65	NCT02105974	NA	Siler, T. M., Nagai, A., Scott-Wilson, C. A., Midwinter, D. A., & Crim, C. (2017). A randomised, phase III trial of once-daily fluticasone furoate/vilanterol 100/25 μg versus once-daily vilanterol 25 μg to evaluate the contribution on lung function of fluticasone furoate in the combination in patients with COPD. Respiratory Medicine, 123, 8-17.	III	Fluticasone Furoate/Vilanterol	Vilanterol	Secondary+exploratory		SGRQ-C	CAT	CASA-Q (exploratory)															Combined symptom scores: Breathlessness, Cough, sputum, total symptoms
66	NCT01376245	NA	Zheng, J., de Guia, T., Wang-Jairaj, J., Newlands, A. H., Wang, C., Crim, C., & Zhong, N. (2015). Efficacy and safety of fluticasone furoate/vilanterol (50/25 mcg; 100/25 mcg; 200/25 mcg) in Asian patients with chronic obstructive pulmonary disease: a randomized placebo-controlled trial. Current Medical Research and Opinion, 31(6), 1191-1200.	III	Fluticasone furoate/vilanterol	Placebo	Secondary															CRQ-SAS
67	NCT00206167	NA	Rennard, S. I., Tashkin, D. P., McElhattan, J., Goldman, M., Ramachandran, S., Martin, U. J., & Silkoff, P. E. (2009). Efficacy and tolerability of budesonide/formoterol in one hydrofluoroalkane pressurized metered-dose inhaler in patients with chronic obstructive pulmonary disease. Drugs, 69(5), 549-565.	III	Budesonide/formoterol pMDI	Formoterol Turbuhaler	Secondary	SGRQ																Dyspnea using Breathlessness Diary (a validated single-item component of the Breathlessness Cough and Sputum Scale, BCSS)		Sleep score
68	NCT02157935	RISE	Ferguson, G. T., Tashkin, D. P., Skärby, T., Jorup, C., Sandin, K., Greenwood, M., ... & Trudo, F. (2017). Effect of budesonide/formoterol pressurized metered-dose inhaler on exacerbations versus formoterol in chronic obstructive pulmonary disease: the 6-month, randomized RISE (Revealing the Impact of Symbicort in reducing Exacerbations in COPD) study. Respiratory Medicine, 132, 31-41.	III	Symbicort Formoterol turbohaler	Placebo for Symbicort pMDI Placebo for Formoterol Turbohaler	Secondary	SGRQ
69	NCT00419744	NA	Sharafkhaneh, A., Southard, J. G., Goldman, M., Uryniak, T., & Martin, U. J. (2012). Effect of budesonide/formoterol pMDI on COPD exacerbations: a double-blind, randomized study. Respiratory Medicine, 106(2), 257-268.	III	Budesonide/formoterol	Formoterol Turbuhaler	Secondary	SGRQ																		Dyspnea Symptom Scores: 5-point Likert-type scale, ranging from 0 to 4 with higher scores indicating a more severe manifestation of the Dyspnea symptom
70	NCT01069289	SUMIRE	Fukuchi, Y., Samoro, R., Fassakhov, R., Taniguchi, H., Ekelund, J., Carlsson, L. G., & Ichinose, M. (2013). Budesonide/formoterol via Turbuhaler® versus formoterol via Turbuhaler® in patients with moderate to severe chronic obstructive pulmonary disease: Phase III multinational study results. Respirology, 18(5), 866-873.	III	Budesonide/formoterol (Symbicort Turbuhaler)	Formoterol (Oxis Turbuhaler)	Secondary	SGRQ																		COPD symptom scores: Nighttime Awakening, breathlessness, cough, total symptoms due to Chronic Obstructive Pulmonary Disease (COPD) Symptoms; 0-4 scale
71	NCT00929851	FORWARD	Singh, Dave, Jorg Kampschulte, Jadwiga A. Wedzicha, Paul W. Jones, Géraldine Cohuet, Massimo Corradi, Tim Higenbottam, Stefano Petruzzelli, and Jørgen Vestbo. "A trial of beclomethasone/formoterol in COPD using EXACT-PRO to measure exacerbations." (2013): 12-17.	III	Beclomethasone/formoterol (CHF1535)	Formoterol fumarate	Secondary+exploratory	SGRQ								EXACT-PRO (exploratory)
72	NCT01245569	FUTURE	Singh, D., Nicolini, G., Bindi, E., Corradi, M., Guastalla, D., Kampschulte, J., ... & Vestbo, J. (2014). Extrafine beclomethasone/formoterol compared to fluticasone/salmeterol combination therapy in COPD. BMC Pulmonary Medicine, 14(1), 43.	III	Foster® 100/6 µg/unit dose ( beclomethasone dipropionate/formoterol fumarate (BDP/FF) extrafine combination)	Seretide Accuhaler® 500/50 µg/actuation	Secondary	SGRQ							TDI											Symptoms assessed with the diary card included ability to perform usual daily activities, breathlessness, night waking caused by respiratory symptoms, breathlessness on rising, cough and sputum production; each was assigned a score ranging from 0 (no symptoms) to 3 (worst), giving a maximum total score of 18 / day
73	NCT01908140	AFFIRM	Vogelmeier, C., Paggiaro, P. L., Dorca, J., Sliwinski, P., Mallet, M., Kirsten, A. M., ... & Leselbaum, A. (2016). Efficacy and safety of aclidinium/formoterol versus salmeterol/fluticasone: a phase 3 COPD study. European Respiratory Journal, 48(4), 1030-1039.	III	Aclidinium Bromide / Formoterol Fumarate	Salmeterol / Fluticasone	Secondary	SGRQ		CAT					TDI	EXACT-PRO	E-RS									Nighttime and early-morning symptom scores
74	NCT00363896	ACCLAIM/COPD I	Jones, P. W., Rennard, S. I., Agusti, A., Chanez, P., Magnussen, H., Fabbri, L., ... & Caracta, C. (2011). Efficacy and safety of once-daily aclidinium in chronic obstructive pulmonary disease. Respiratory Research, 12(1), 55.	III	Aclidinium bromide	Placebo	Secondary	SGRQ							TDI											Symptom scores for breathlessness, cough, sputum production or wheezing, or use of daily rescue medication
75	NCT00358436	ACCLAIM/COPD II	Jones, P. W., Rennard, S. I., Agusti, A., Chanez, P., Magnussen, H., Fabbri, L., ... & Caracta, C. (2011). Efficacy and safety of once-daily aclidinium in chronic obstructive pulmonary disease. Respiratory Research, 12(1), 55.	III	Aclidinium bromide	Placebo	Secondary	SGRQ							BDI, TDI											symptom scores for breathlessness, cough, sputum production or wheezing, or use of daily rescue medication
76	NCT00891462	ACCORD COPD I	Kerwin, E. M., D'Urzo, A. D., Gelb, A. F., Lakkis, H., Gil, E. G., & Caracta, C. F. (2012). Efficacy and safety of a 12-week treatment with twice-daily aclidinium bromide in COPD patients (ACCORD COPD I). COPD: Journal of Chronic Obstructive Pulmonary Disease, 9(2), 90-101.	III	Aclidinium bromide	Placebo	Additional	SGRQ							BDI, TDI											Daily sleep dairy; COPD Nighttime and early morning symptoms Questionnaire
77	NCT01462929	NA	Beier, J., Kirsten, A. M., Mróz, R., Segarra, R., Chuecos, F., Caracta, C., & Gil, E. G. (2013). Efficacy and safety of aclidinium bromide compared with placebo and tiotropium in patients with moderate-to-severe chronic obstructive pulmonary disease: results from a 6-week, randomized, controlled Phase IIIb study. COPD: Journal of Chronic Obstructive Pulmonary Disease, 10(4), 511-522.	III	Aclidinium bromide	Placebo	Additional										E-RS									COPD/additional symptom questionnaire/ Early morning and nighttime symptom scores (components: Phlegm, Shortness of breathe, wheeze and cough)			Willingness to continue use (scale 0='not willing’ to 100='definitely willing’) Overall inhaler preference
78	NCT02465567	ETHOS	NA	III	Budesonide, Glycopyrronium, Formoterol Fumarate Aerosol (BGF MDI) 320/14.4/9.6 μg	Budesonide, Formoterol Fumarate Aerosol Glycopyrronium and Formoterol Fumarate Inhalation (BFF MDI 320/9.6 μg), Glycopyrronium and Formoterol Fumarate (GFF MDI)	Secondary	SGRQ
79	NCT03162055	AERISTO	Maltais, F., Ferguson, G. T., Feldman, G. J., Deslee, G., Bourdin, A., Fjällbrant, H., ... & Martin, U. J. (2019). A randomized, double-blind, double-dummy study of glycopyrrolate/formoterol fumarate metered dose inhaler relative to umeclidinium/vilanterol dry powder inhaler in COPD. Advances in Therapy, 36(9), 2434-2449.	III	Glycopyrrolate/formoterol fumarate metered dose inhaler (GFF MDI) 18/9.6 μg	Umeclidinium/vilanterol dry powder inhaler (UV DPI) 62.5/25 μg	Secondary+Other			CAT (other)					TDI (secondary)			EMSCI/NiSCI
80	NCT02497001	KRONOS	Ferguson, G. T., Rabe, K. F., Martinez, F. J., Fabbri, L. M., Wang, C., Ichinose, M., ... & Aurivillius, M. (2018). Triple therapy with budesonide/glycopyrrolate/formoterol fumarate with co-suspension delivery technology versus dual therapies in chronic obstructive pulmonary disease (KRONOS): a double-blind, parallel-group, multicentre, phase 3 randomised controlled trial. The Lancet Respiratory …	III	BGF MDI 320/14.4/9.6 μg GFF MDI (PT003) 14.4/9.6 μg BFF MDI (PT009) 320/9.6 μg Symbicort® Turbuhaler® (TBH) Inhalation Powder		Secondary	SGRQ							BDI/TDI		E-RS
81	NCT02138916	GALATHEA	Criner, G. J., Celli, B. R., Singh, D., Agusti, A., Papi, A., Jison, M., ... & Martin, U. J. (2020). Predicting response to benralizumab in chronic obstructive pulmonary disease: analyses of GALATHEA and TERRANOVA studies. The Lancet Respiratory Medicine, 8(2), 158-170.	III	Benralizumab	Placebo	Secondary	SGRQ								EXACT-PRO	E-RS
82	NCT02727660	SOPHOS	Hanania, N. A., Papi, A., Anzueto, A., Martinez, F. J., Rossman, K. A., Cappelletti, C. S., ... & Dorinsky, P. M. (2020). Efficacy and safety of two doses of budesonide/formoterol fumarate metered dose inhaler in COPD. ERJ Open Research, 6(2).	III	BFF MDI (PT009) 320/9.6 μg BFF MDI (PT009) 160/9.6 μg	FF MDI (PT005) 9.6 μg	Secondary	SGRQ		CAT
83	NCT02766608	TELOS	Ferguson, G. T., Papi, A., Anzueto, A., Kerwin, E. M., Cappelletti, C., Duncan, E. A., ... & Dorinsky, P. (2018). Budesonide/formoterol MDI with co-suspension delivery technology in COPD: the TELOS study. European Respiratory Journal, 52(3).	III	BFF MDI 320/9.6 μg BFF MDI160/9.6 μg FF MDI 9.6 μg BD MDI 320 μg Symbicort® TBH 400/12 μg BID		Secondary	SGRQ
84	NCT02184611	NA	Zhong, N., Zheng, J., Lee, S. H., Lipson, D. A., Du, X., & Wu, S. (2020). Efficacy and Safety of Once-Daily Inhaled Umeclidinium in Asian Patients with COPD: Results from a Randomized, Placebo-Controlled Study. International Journal of Chronic Obstructive Pulmonary Disease, 15, 809.	III	Umeclidinium bromide	Placebo	Secondary	SGRQ		CAT					TDI
85	NCT02257372	NA	Sousa, A. R., Riley, J. H., Church, A., Zhu, C. Q., Punekar, Y. S., & Fahy, W. A. (2016). The effect of umeclidinium added to inhaled corticosteroid/long-acting β 2-agonist in patients with symptomatic COPD: a randomised, double-blind, parallel-group study. NPJ Primary Care Respiratory Medicine, 26, 16031.	IV	UMEC DPI ICS/LABA medication Albuterol/ salbutamol MDI	Placebo	Other		SGRQ-C	CAT					TDI
86	NCT00523991	NA	NA	IV	Tiotropium	Placebo	Secondary																				Categorical Scores on Patient's Global Assessment: on the subject's need to take additional medications for breathing, their need for emergency room or hospital visits for COPD, and severity and amount of coughing, wheezing, and/or breathing discomfort experienced, and the impact of these symptoms on the subject's ability to exercise and perform daily activities.
87	NCT00975195	NA	Magnussen, H., Disse, B., Rodriguez-Roisin, R., Kirsten, A., Watz, H., Tetzlaff, K., ... & Chanez, P. (2014). Withdrawal of inhaled glucocorticoids and exacerbations of COPD. N Engl J Med, 371, 1285-1294.	IV	Tiotropium inhalation, Salmeterol xinafoate, Fluticasone propionate	Placebo matched for fluticasone propionate	Secondary	SGRQ			CASA-Q
88	NCT01483625	TICARI1	Mannino, D. M., Clerisme-Beaty, E. M., Franceschina, J., Ting, N., & Leidy, N. K. (2018). exacerbation recovery patterns in newly diagnosed or maintenance treatment-naïve patients with COPD: secondary analyses of TICarI 1 trial data. International Journal of Chronic Obstructive Pulmonary Disease, 13, 1515.	IV	Tiotropium	Placebo	Other			CAT						EXACT-PRO
89	NCT00359788	NA	NA	IV	Tiotropium	Combivent (Ipratropium/Albuterol)	Secondary																				Patient global evaluation: patient's opinion of their overall condition with respect to chronic obstructive pulmonary disease (COPD). The scale responses were: Poor (1,2). Fair (3,4), Good (5,6) and Excellent (7,8)
90	NCT01272362	REVERBREZ	Burgel, P. R., Le Gros, V., Decuypère, L., Bourdeix, I., Perez, T., & Deslée, G. (2017). Immediate salbutamol responsiveness does not predict long-term benefits of indacaterol in patients with chronic obstructive pulmonary disease. BMC Pulmonary Medicine, 17(1), 25.	IV	Indacaterol	None	Secondary							CCQ
91	NCT01555138	INSTEAD	Rossi, A., van der Molen, T., del Olmo, R., Papi, A., Wehbe, L., Quinn, M., ... & Altman, P. (2014). INSTEAD: a randomised switch trial of indacaterol versus salmeterol/fluticasone in moderate COPD. European Respiratory Journal, 44(6), 1548-1556.	IV	Indacaterol	Salmeterol	Secondary		SGRQ-C						TDI
92	NCT01727024	INHALATOR	de Oliveira, M. V. C., Pizzichini, E., da Costa, C. H., Fritscher, C. C., Vianna, E. O., Teixeira, P. J. Z., ... & de Pinho, N. C. (2018). Evaluation of the preference, satisfaction and correct use of Breezhaler® and Respimat® inhalers in patients with chronic obstructive pulmonary disease–INHALATOR study. Respiratory Medicine, 144, 61-67.	IV	Tiotropium	Indacaterol	Secondary																						Feeling of Satisfaction With the Inhaler (FSI-10) Questionnaire
93	NCT01488019	NA	Hanania, N. A., Sethi, S., Koltun, A., Ward, J. K., Spanton, J., & Ng, D. (2019). Long-term safety and efficacy of formoterol fumarate inhalation solution in patients with moderate-to-severe COPD. International Journal of chronic Obstructive Pulmonary Disease, 14, 117.	IV	Formoterol fumarate (Perforomist)	Perforomist-Placebo	Secondary	SGRQ							TDI
94	NCT00496470	NA	Welte, T., Miravitlles, M., Hernandez, P., Eriksson, G., Peterson, S., Polanowski, T., & Kessler, R. (2009). Efficacy and tolerability of budesonide/formoterol added to tiotropium in patients with chronic obstructive pulmonary disease. American Journal of Respiratory and Critical Care Medicine, 180(8), 741-750.	IV	Symbicort (budesonide/formoterol turbuhaler 320/9 μg)	Spiriva (tiotropium bromide 18 μg)	Secondary		SGRQ-C			CDLM							GCSQ							e-diary: COPD symptom scores: Breathing, sleeping, chest, cough scores (0-4 scale)
95	NCT02375724	NA	Smith, J. A., McGarvey, L., Morice, A. H., Birring, S. S., Wedzicha, J. A., Notari, M., ... & Jarreta, D. (2019). The Effect of Aclidinium on Symptoms Including Cough in Chronic Obstructive Pulmonary Disease: A Phase 4, Double-Blind, Placebo-controlled, Parallel-Group Study. American Journal of Respiratory and Critical Care Medicine, 200(5), 642-645.	IV	Aclidinium bromide	Placebo	Primary (ERS)+ Secondary (ERS, LCQ)+exploratory (CAT)			CAT			LCQ				E-RS									Cough score (VAS)
96	NCT02473237	EMERALD	NA	IV	Indacaterol	Triotropium	Secondary																Borg Scale
97	NCT02566031	NA	Rhee, C. K., Park, H. Y., Park, J. W., Lee, J. H., Kim, T. H., Lee, S. W., ... & Jung, K. S. (2017). Efficacy and safety of indacaterol/glycopyrronium fixed-dose combination in mild-to-moderate COPD patients symptomatic on tiotropium in Korea: study protocol for a randomized controlled trial. Trials, 18(1), 80.	IV	Indacaterol and glycopyrronium (QVA149), IND/GLY 110/50 μg delivered via the Breezhaler	Once-daily tiotropium 18 μg delivered via the HandiHaler	Secondary+exploratory			CAT					BDI														Patient satisfaction and patient preference (exploratory)
98	NCT02567214	RED	NA	IV	Indacaterol 110 µg/Glycopyrronium 50 µg (Ultibro)	Spriva	Primary+ secondary			CAT (secondary)					BDI/TDI								Borg Scale
99	NCT02864342	NA	Criner, G. J., Cole, T., Hahn, K., Kastango, K., Eudicone, J., & Gilbert, I. (2018). Late breaking abstract-a randomized clinical study to assess the impact of budesonide/formoterol (BUD/FM) pMDI medication reminders on adherence in COPD patients. ERS,PA1988.	IV	BreatheMate device with application (Symbicort pressurized Metered Dose Inhaler (pMDI)	BreatheMate device without application	Secondary							CCQ
100	NCT02429765	NA	NA	IV	Aclidinium Bromide/Formoterol	Placebo	Secondary											EMSCI
101	NCT03159091	NA	NA	IV	Rengalin	Placebo	Primary+ secondary			CAT (secondary)															CSS (primary)
102	NCT02845752	NA	NA	IV	BI-1744-CL/tiotropium bromide (Stiolto Respimat)	Placebo	Secondary																Borg CR 10
103	NCT03034915	EMAX	Kerwin, E. M., Vogelmeier, C., Bjermer, L., Maltais, F., Watkins, M. L., Tombs, L., ... & Jones, P. (2019). Comparative Efficacy of Once-Daily Umeclidinium and Twice-Daily Salmeterol in Symptomatic Patients with Chronic Obstructive Pulmonary Disease Free of Inhaled Corticosteroids: Results from the EMAX Trial. In B45. COPD: TREATMENT (pp. A3320-A3320). American Thoracic Society.	IV	Umeclidinium/Vilanterol 62.5/25 mcg via ELLIPTA Umeclidinium 62.5 mcg via ELLIPTA Salmeterol 50 mcg via DISKUS	Placebo via ELLIPTA Placebo via DISKUS	Secondary	SGRQ		CAT					SAC TDI		E-RS
104	NCT03467425	INTREPID	Worsley, S., Snowise, N., Halpin, D. M., Midwinter, D., Ismaila, A. S., Irving, E., ... & Compton, C. (2019). Clinical effectiveness of once-daily fluticasone furoate/umeclidinium/vilanterol in usual practice: the COPD INTREPID study design. ERJ Open Research, 5(4).	IV	TRELEGY ELLIPTA [Fluticasone Furoate(FF)/Umeclidinium Bromide (UMEC)/ Vilanterol (VI) : 100 mcg/62.5 mcg/25 mcg]	Non-ELLIPTA MITT	Primary			CAT

## Sheet: Sheet2
Brand	Molecule	Claim	SGRQ/SGRQ-c	EXACT-PRO/ERS	Symptom scores/diaries*	SOBDA	SOBQ	Borg	CRQ-SAS	EQ-5D
Advair diskus	Fluticasone Propionate, Salmeterol Xinafoate	EMA	Not reported
Advair diskus		FDA	Not reported		secondary
Airexar Spiromax	Salmeterol Xinafoate, Fluticasone Propionate	EMA	other		secondary
Anoro	Umeclidinium Bromide, Vilanterol Trifenatate	EMA	secondary
Anoro Ellipta	Umeclidinium Bromide, Vilanterol Trifenatate	FDA	Not reported			Not reported
Atrovent HFA	Ipratropium Bromide	FDA			not reported
Arcapta	Indacaterol Maleate	FDA	secondary
Biresp Spiromax	Budesonide, Formoterol Fumarate Dihydrate	FDA	Not reported			not reported
Breo Ellipta	Fluticasone Furoate, Vilanterol Trifenatate	FDA	other						other
Bretaris Genuair	Aclidinium Bromide	EMA	secondary					secondary
Brimica Genuair	Formoterol Fumarate Dihydrate, Aclidinium Bromide	EMA	Not reported	other
Budesonide/Formoterol Teva	Budesonide, Formoterol Fumarate Dihydrate	EMA	Not reported		not reported
Brovana	Arformoterol Tartrate	FDA	Not reported		not reported
Combivent Respimat	Pratropium Bromide, Albuterol Sulfate	FDA			not reported
Daliresp/Daxas/Libertek	Roflumilast	EMA	Not reported				not reported
Daliresp	Roflumilast	FDA	Not reported		not reported					not reported
Duaklir Genuair	Aclidinium Bromide, Formoterol Fumarate	EMA	secondary	other
Duoresp Spiromax	Budesonide, Formoterol Fumarate Dihydrate	EMA	Not reported		not reported
Foradil Aerolizer	Formoterol Fumarate	FDA	Not reported		not reported
Hirobriz Breezhaler	Indacaterol	EMA	secondary
Incruse/ Rolufta	Umeclidinium Bromide	EMA	other
Incruse Ellipta	Umeclidinium Bromide	FDA	other
Laventair	Umeclidinium Bromide, Vilanterol Trifenatate	EMA	secondary
Perforomist	Formoterol Fumarate	EMA	Not reported
Seebri neohaler	Glycopyrrolate	FDA	other
Spiriva Handhaler	Tiotropium Bromide	FDA	Not reported
Spiriva Respimat	Tiotropium Bromide	FDA	Not reported		secondary
Stiolto Respimat	Tiotropium Bromide, Olodaterol	FDA	other
Striverdi Respimat	Olodaterol	FDA	Not reported
Symbicort	Budesonide, Formoterol Fumarate Dihydrate	FDA	Not reported
Tovanor/Seebri	Glycopyrronium Bromide	EMA	secondary		not reported			not reported
Trimbow	Beclomethasone Dipropionate, FF, DGP	EMA	secondary
Utibron Neohaler	Glycopyrrolate, Indacaterol	FDA	other
Ultibro	Indacaterol, Glycopyrronium	EMA	secondary		secondary
Tudorza Pressair	Aclidinium Bromide	FDA	Not reported	not reported	not reported					not reported
